# Supplementary material
Source: PubMed Central journal article supplement (PMC4820130)
Supplement: supp_WNL.0000000000002491_Table_e-1.pdf [file supp_WNL.0000000000002491_Table_e-1.pdf]

**Table e-1. Variants of Alien Hand Syndrome.**

| <b>Variant</b>                           | <b>Main features</b>                                                                                                      | <b>Associated features</b>                                                                             | <b>Common etiologies</b>                                                                                                   |
|------------------------------------------|---------------------------------------------------------------------------------------------------------------------------|--------------------------------------------------------------------------------------------------------|----------------------------------------------------------------------------------------------------------------------------|
| <b>Frontal (wayward, “pseudo-alien”)</b> | “Frontal” alien hand syndrome: grasping reflex, manual groping, and utilization behavior of the <i>contralateral</i> hand | Groping, grasping and utilization behaviors are “disobedient” or “wayward” but not truly alien.        | Medial frontal, supplementary motor cortex or anterior callosum (tumors, left ACA stroke)                                  |
| <b>Callosal</b>                          | Intermanual conflict and manual interference of the usually of the <i>contralateral</i> hand                              | Other disconnection syndromes: ideomotor apraxia, tactile anomia, and agraphic aphasia                 | Callosotomy, callosum demyelination (multiple sclerosis, Machiafava–Bignami syndrome), tumors (lipomas, gliomas, lymphoma) |
| <b>Posterior (“classic” alien)</b>       | “Sensory” alien hand syndrome: withdrawal or avoidance of the <i>contralateral</i> hand                                   | Hemianesthesia, anosognosia, hemianopia, dystonia, cortical sensory loss, and “triple ataxia” in some* | Parieto-occipital region lesions (AD, DLB, CBD, CJD and PCA-distribution strokes)                                          |

\*The posterior alien hand may be associated with “triple ataxia” in patients with extensive PCA-distribution stroke: sensory ataxia (involvement of the ventral posterolateral thalamus), cerebellar ataxia (lesion of dentatorubrothalamic tract), and optic ataxia (damage to the splenium and occipital cortex). AD: Alzheimer’s disease; CBD: corticobasal degeneration; CJD: Creutzfeldt-Jakob disease; DLB: dementia with Lewy bodies; PCA: posterior cerebral artery.
